# Supplementary material for: National Early Warning Score (NEWS) Outperforms Quick Sepsis-Related Organ Failure (qSOFA) Score for Early Detection of Sepsis in the Emergency Department
Source: MDPI journal article supplement (doi:10.3390/antibiotics11111518), 2022-10-31
Supplement: s1 [file s1]

**Supplementary Table S1. Sensitivity and specificity of qSOFA and NEWS according to site of infection.**

| Site of infection      |         | NEWS ≥ 5        |                 | qSOFA ≥ 2     |                 |
|------------------------|---------|-----------------|-----------------|---------------|-----------------|
|                        | N       | Sensitivity     | Specificity     | Sensitivity   | Specificity     |
| Pulmonary              | 228/322 | 90<br>(86-94)   | 49<br>(38-59)   | 30<br>(24-37) | 93<br>(85-97)   |
| Urogenital             | 56/102  | 68<br>(54-80)   | 67<br>(52-80)   | 36<br>(23-50) | 87<br>(74-95)   |
| Gastrointestinal       | 32/67   | 72<br>(53-86)   | 83<br>(66-93)   | 34<br>(19-53) | 97<br>(85-100)  |
| Osteoarticular         | 15/17   | 73<br>(45-92)   | 100<br>(16-100) | 40<br>(16-68) | 100<br>(16-100) |
| Cutaneous/soft tissues | 16/29   | 62<br>(35-85)   | 69<br>(39-91)   | 6<br>(0-30)   | 85<br>(55-98)   |
| Systemic               | 5/6     | 100<br>(48-100) | 100<br>(3-100)  | 80<br>(28-99) | 100<br>(3-100)  |
| Unknown                | 2/5     | 100<br>(16-100) | 67<br>(9-99)    | 50<br>(1-99)  | 100<br>(29-100) |
| Overall                | 354/548 | 83<br>(79-87)   | 62<br>(55-69)   | 32<br>(27-37) | 92<br>(87-95)   |

**Supplementary Table S2. Sensitivity and specificity of qSOFA and NEWS according to age.**

| Age (yr) range |         | NEWS ≥ 5        |               | qSOFA ≥ 2     |                |
|----------------|---------|-----------------|---------------|---------------|----------------|
|                | N       | Sensitivity     | Specificity   | Sensitivity   | Specificity    |
| 18-44          | 6/20    | 100<br>(54-100) | 57<br>(29-82) | 33<br>(4-78)  | 93<br>(66-100) |
| 45-54          | 14/29   | 93<br>(66-100)  | 67<br>(38-88) | 21<br>(5-51)  | 87<br>(60-98)  |
| 55-64          | 29/59   | 83<br>(64-94)   | 47<br>(28-66) | 31<br>(15-51) | 93<br>(78-99)  |
| 65-74          | 60/96   | 90<br>(79-96)   | 47<br>(30-65) | 33<br>(22-47) | 97<br>(85-100) |
| 75-84          | 85/161  | 80<br>(70-88)   | 57<br>(45-68) | 27<br>(18-38) | 91<br>(82-96)  |
| 85-above       | 106/191 | 88<br>(80-93)   | 59<br>(48-69) | 42<br>(33-52) | 86<br>(77-92)  |
| All            | 300/556 | 86<br>(82-90)   | 55<br>(49-62) | 34<br>(29-40) | 90<br>(86-94)  |
